# Supplementary material for: Evaluation of an HMGA2 variant for pleiotropic effects on height and metabolic traits in ponies
Source: PubMed Central journal article supplement — J Vet Intern Med. 2019 Jan 21;33(2):942–52. doi: 10.1111/jvim.15403 (PMC6430908; doi:10.1111/jvim.15403), 2019-01-21
Supplement: JVIM-33-942-s003.pdf [file JVIM-33-942-s003.pdf]

| <b>Section</b> | <b>Pedigree</b>                               | <b>Height Requirements</b> |
|----------------|-----------------------------------------------|----------------------------|
| A              | A X A                                         | Up to 12.2 hands (50 in)   |
| B              | AXB or BXB                                    | Up to 14.2 hands (58 in)   |
| C              | At least one C or D parent                    | Up to 13.2 hands (54 in)   |
| D              | At least one C or D parent                    | Over 13.2 hands (54 in)    |
| H              | At least one registered purebred Welsh parent | No height limit            |
| P              | At least one registered half Welsh parent     | No height limit            |

**Supplemental Table 1: Breed requirements for Welsh pony sections based on pedigree and height requirements.**

| <b>Breed</b>       | <b>Number of Individuals</b> |
|--------------------|------------------------------|
| Yakutian           | 9                            |
| Welsh Pony         | 44                           |
| Warmblood          | 18                           |
| Thoroughbred       | 25                           |
| Standardbred       | 40                           |
| Przewalski         | 13                           |
| Morgan             | 61                           |
| Maremmano          | 22                           |
| Lusitano           | 21                           |
| Icelandic          | 18                           |
| Hanoverian         | 8                            |
| French Trotter     | 21                           |
| Franchese Montagne | 30                           |
| Belgian            | 22                           |
| Arabian            | 36                           |
| Quarter Horse      | 75                           |
| <b>Total</b>       | <b>463</b>                   |

**Supplemental Table 2: Reference population used for the calculation of  $d_i$ .**

| Exon | EquCab2                | EquCab3                | HMGA2 Horse Exon Sequence                                                                                                        | Forward Primer                                                                             | Reverse Primer                                                                              | BP  |
|------|------------------------|------------------------|----------------------------------------------------------------------------------------------------------------------------------|--------------------------------------------------------------------------------------------|---------------------------------------------------------------------------------------------|-----|
| 1    | N/A                    | 80374152 -<br>80374262 | ATGAGCGCACGCGGTGAGGG<br>CGCCGGGCAGCCGTCCA<br>CAGCCCAGGGACAACCTGCC<br>GCCCCGGCGCCTCAGAAGAG<br>AGGACGCGGCCGACCCAGGA<br>AGCAGCAGCAA | CTCGTCCTCCAGCCCTATC<br>(Sanger Sequencing)<br><br>CTTCAGCCCAGGGACAAG<br>(Genotyping Assay) | CGTGCACAATAGCGAAAGTC<br>(Sanger Sequencing)<br><br>ACTGACTTGCTGCTGCTT<br>(Genotyping Assay) | 491 |
| 2    | 81392745 -<br>81392831 | 80376870 -<br>80376956 | GAGCCAACCGGTGAGCCCTC<br>TCCTAAGAGACCCAGGGGAA<br>GACCCAAAGGCAGCAAAAAC<br>AAGAGTCCCTCCAAAGCAGCT<br>CAAAAG                          | GTTCCAACCCTTCTGTGCGA<br>G                                                                  | ACTGGGTTTTGCAGTAGTCA                                                                        | 623 |
| 3    | 81402791 -<br>81402841 | 80386916 -<br>80386966 | AAAGCAGAAGCCACTGGAGA<br>AAAACGGCCAAGAGGCAGAC<br>CTAGGAAATGG                                                                      | AAACGGGGCAGAGGAATC<br>TA                                                                   | GAGCGTCTCCTGGAAAGAAC                                                                        | 458 |
| 4    | 81503615 -<br>81503647 | 80487792 -<br>80487824 | CCACAACAAGTCGTTCAGAAG<br>AAGCCTGCTCAG                                                                                            | GACCATGTATAAACACCCT<br>TTAACC                                                              | GGTTTTAATCACACAACCA<br>CAG                                                                  | 383 |
| 5    | 81515174 -<br>81515221 | 80499351 -<br>80499398 | GACAATGTTGCCTTGCCTGG<br>GAAAGACCATCTAGGCAATCT<br>TATGTGTCTACTACTTTTATA<br>AATGCTGCTTGA                                           | GCAGAACCTGCTGGAGTC<br>AC                                                                   | TGTGGGCAAGTGAATAATTG                                                                        | 398 |

**Supplemental Table 3: PCR primers [for Sanger sequencing](#) and annotation for *HMGA2* exon sequencing.** Based on poor annotation of the *HMGA2* gene in EquCab2 reference genome, we did a full reconstruction of the gene. Notably, Ensembl has this gene positioned for the horse at equine chromosome 6 (ECA6): 81,197,462-81,402,841 in contrast to NCBI position at ECA6: 81,389,151-81,518,054. Neither assembly included the ~1.4 kilobases annotated by Frishchnecht et al, including exon 1 and the 5' UTR (GenBank: LN8490000.1). Based on our annotation of exons 2-5, the NCBI position appears more accurate and corresponds with the most predominant peak identified in the haplotype analysis for baseline insulin (ECA6: 81,381,221-81,583,507). Base pair locations for EquCab2 and EquCab3 are also provided.

| Exon | EquCab2                | EquCab3                | IRAK3 Horse Exon Sequence                                                                                                                                                                                                                                                                                                                                                                                                                                           | Forward Primer             | Reverse Primer             | BP  |
|------|------------------------|------------------------|---------------------------------------------------------------------------------------------------------------------------------------------------------------------------------------------------------------------------------------------------------------------------------------------------------------------------------------------------------------------------------------------------------------------------------------------------------------------|----------------------------|----------------------------|-----|
| 1    | N/A                    | 80681675 -<br>80681889 | AATTTCCGCGGTTGTGTAAGTCCCGCC<br>GCGGGCGCGCAGCGGCCTGGCCTCGCC<br>TCCCTCCTCCACCGGGCCCTGCTCTCCG<br>GCGGCAGAGCTATGGCCTGGGCGGCAG<br>CGGCGGGCAGCGGCGGGGCCCGCGGC<br>CAGCTCTCGGCGCACACGCTCCTCTTCG<br>ACCTGCCTCCCGTGCTGCTGGGCGAGCT<br>CTGCGCCGTCTGGACAGCTGCGACGG<br>CGCGCTCGGCTGGCGCCGCTCGGTGA<br>GTGCGCCCGGGCGGGCGGGGGCTCCG<br>CGCACGCTCCGTGCCCCCGCGCCGGG<br>GGTCGCTCCACCGGCCCCAGGACTGGG<br>GCCTCCGCGCACGCTCCGTGCGCCCCG<br>CGCCGTGCTGGGGCCGCTCCGCCCCTT<br>CCTGGACCGAGTCTCCGTG | AATTTCCGCGGTTGTG<br>TAAC   | CACGGAGACTCGGTC<br>CAG     | 399 |
| 2    | 81711764 -<br>81711955 | 80696010 -<br>80696192 | GCGGAGCGACTTTCAAGCAGCTGGCTGG<br>ATGTTTCGTCACATTGAAAAGTATGTAGAC<br>CAAGGGAAAAGTGGAACGAGAGAATTGC<br>TTTGCTCTGGGCACAGAAAAACAAGAC<br>CATCGGTGACCTTTTACAGATCCTCCAG<br>GAGATGGGGCATCATCGAGCTATCCATT<br>TAATTACAAACCATGGTAAACAC                                                                                                                                                                                                                                            | GTTGTCACTGCCTCC<br>GATC    | AAGTTTGGCAAGAAG<br>GAAGGA  | 580 |
| 3    | 81720696 -<br>81720760 | 80704941 -<br>80705005 | GAGCAGCCTTGAATCCTTCAGAGCAGAG<br>TCACCTGGGAGATGGATTTCCAAGCATG<br>TTACCCAAG                                                                                                                                                                                                                                                                                                                                                                                           | TTCAATGGAAATGACA<br>CTGAGC | TCCTGAATCCCCAACT<br>AAACA  | 372 |
| 4    | 81721655 -<br>81721709 | 80705900 -<br>80705954 | GAAACAACCAATGTCACAGTGGATAATGT<br>TCTTATTCCTAAACATAATGAAAAAG                                                                                                                                                                                                                                                                                                                                                                                                         | AGAGTTGGTATGGAA<br>GCCTT   | CACCCATCAGAACCAT<br>GTGT   | 437 |
| 5    | 81722977 -<br>81723128 | 80707222 -<br>80707373 | GAATATTGTTTAAACCTTCTATCAGCTTTC<br>AAAACATCACAGAAGGAACCAAAAATTTT<br>CACAAAGACTTCTAATTGGAGAAGGGG<br>AGATTTTTGAGGTGTACAGAGTGGAGAT<br>CCAAAACCGAACGTATGCCGTTAAATTAT<br>TTAAACAG                                                                                                                                                                                                                                                                                         | GCTCTCCTGACTTTCC<br>ACTG   | TCAGTCATTTCTCCAG<br>TCACC  | 451 |
| 6    | 81726877 -<br>81726941 | 80711122 -<br>80711186 | GAGAAAAAATGCAATGTAAGCAACAATG<br>GAAGAGCTTTTTATCTGAGCTTGAAGTTT<br>TACTACT                                                                                                                                                                                                                                                                                                                                                                                            | AGCGGTGGTTCTGAT<br>TGTTT   | AGGAATATACCAAGG<br>CAGATGT | 418 |

**Supplemental Table 4: PCR primers and annotation for *IRAK3* exon sequencing.**

| Exon | EquCab2                | EquCab3                | IRAK3 Horse Exon Sequence                                                                                                                                                                                                                                                                                                                                                                                                                                                                                                                    | Forward Primer             | Reverse Primer                  | BP  |
|------|------------------------|------------------------|----------------------------------------------------------------------------------------------------------------------------------------------------------------------------------------------------------------------------------------------------------------------------------------------------------------------------------------------------------------------------------------------------------------------------------------------------------------------------------------------------------------------------------------------|----------------------------|---------------------------------|-----|
| 7    | 81731400 -<br>81731514 | 80715645 -<br>80715759 | GTTTCATCATCCAAACATTCTGGAGTTGGCTGC<br>ATATTTTACAGAGAGTGACAAGTTCTGCCTGGTT<br>TATCCGTATATGAGAAATGGGTCCCTTTTTGACA<br>GACTGCAGTGTGTA                                                                                                                                                                                                                                                                                                                                                                                                              | AATCTGTGTCAC<br>GTGTCTGG   | GTCCTCTGCTTTCTTG<br>GGAA        | 418 |
| 8    | 81732314 -<br>81732432 | 80716559 -<br>80716677 | GGTAACACAGCCCCGCTCTCTTGGCACATTCTGA<br>ATCAGTATCTTAATAGGAGCGTGCAAGGCCATC<br>CAGTATTTGCACAACATCGAGCCGTGCTCAGTT<br>GTCTGTGGCAGCATCTCCAG                                                                                                                                                                                                                                                                                                                                                                                                         | AGGTCGTCAGTA<br>GTAGAGGA   | AGAGTTCTTCACACGA<br>GCAC        | 406 |
| 9    | 81745387 -<br>81745585 | 80729635 -<br>80729833 | TGCAAACATACTTTTTGGATGATCAGTTTCAACCC<br>AAACTAACTGATTTTGGCGTGGCGCACTTCCGA<br>CCCCACCTTGAACACCAGCACTGCACCATCAGC<br>GTGACCGGCTGCAACAGGAAACACCTGTGGTA<br>CATGCCCGAGGAGTACGTCAGGCAGGGCAGAC<br>TCACCGTCAAACCGACGTCTACAGCTTTGGGA<br>TT                                                                                                                                                                                                                                                                                                              | GCTCTAGTTCGT<br>GGAAAATTGC | TTTATATTTTATTGCTT<br>GACTGACTGC | 384 |
| 10   | 81745841 -<br>81745903 | 80730089 -<br>80730151 | GTAATCATGGAAGTTCTGACAGGTTGTAAAGTG<br>GTGTTGGATGAGCCAAAGCACATCCAGCTG                                                                                                                                                                                                                                                                                                                                                                                                                                                                          | TGCAGTCAGTCA<br>AGCAATAAA  | ATTTTCTGTGGTGCCT<br>GGTT        | 661 |
| 11   | 81745992 -<br>81746156 | 80730240 -<br>80730404 | AGGGATCTTCTTATGGAATTGATGGAAAAGAGA<br>GGCCTTGATTCATGTCTCTCATATCTAGATAAGA<br>AAGTGTGTCCCTGTCTCGGAATTTCTCTGCCA<br>AGCTGTTCTTTGGCGGGCCAGTGTGCTGCAA<br>CACGGGCCAAGTTGAGACCATCGATGGATGAA                                                                                                                                                                                                                                                                                                                                                           | TGCAGTCAGTCA<br>AGCAATAAA  | ATTTTCTGTGGTGCCT<br>GGTT        | 661 |
| 12   | 81748556 -<br>81749029 | 80732804 -<br>80733277 | GTCCTGACCGTTCTTGAGAGCACTCCGGCCAGCT<br>TGTATTTTGCTGAAGACCCTCCCGCCTCACTGAAG<br>TCCTTCAGGTGTCCCTTCTCCTCTGTTCTTGGACAA<br>CGTACCAAGTATTCCAGTGGAAAATGATGAAAACC<br>AGAATAACTCTTCCCTGCCTCCTGATAAAGCTTGG<br>AGAAAAGAGAGAATGACTCAGAAAATTCCTTTGA<br>ATGTAGCCAGTCTGAGGTGACGTTTCTGGGCTTTG<br>AGAGAAAGACAGGGAGTCAGAGAAATGAGGATGC<br>TTGCAACATACCCAGTTCTTCTTGTGAAAAGAGTT<br>GGTCTCAAAGGATGCAGCTCCATCCCAGGACTC<br>CAGCACCTGTGGTGTGACTATGGACCCTTCTGCA<br>GAAGCTCTGGGCCAGTCTTACAGGAGCAGGCCAA<br>TGGAGATTAGCTGGTCTTCTGAATTTTCTGGAAT<br>GAATGTGAAGAGTACAAAAAGGAG | GCTCAGGGACCA<br>TGTTTCTC   | ATTTCTAAGCCACCCC<br>GTTT        | 770 |

Supplemental Table 4 (cont): PCR primers and annotation for *IRAK3* exon sequencing.

| Test                                       | Height                                       | Insulin                                         | INS-OST                                         | NEFA                                             | Triglycerides                            |
|--------------------------------------------|----------------------------------------------|-------------------------------------------------|-------------------------------------------------|--------------------------------------------------|------------------------------------------|
| <b>ANOVA<br/>F-statistic<br/>Additive</b>  | -3.78<br>SE=0.21<br>p=<2.2e-16<br>F=<2.2e-16 | .18<br>SE=.031<br>p=7.8e-09<br>F=1.3e-10        | .18<br>SE=.038<br>p=1.9e-06<br>F=1.2e-09        | .043<br>SE=.014<br>p=2.1e-03<br>F=7.1e-04        | .14<br>SE=.038<br>p=2.0e-04<br>F=9.2e-08 |
| <b>ANOVA<br/>F-statistic<br/>Recessive</b> | -4.89<br>SE=.317<br>p=<2.2e-16<br>F=<2.2e-16 | .28<br>SE=.043<br>p=4.9e-10<br><b>F=8.8e-12</b> | .28<br>SE=.052<br>p=1.3e-07<br><b>F=9.3e-11</b> | .074<br>SE=.020<br>p=1.7e-04<br><b>F=8.7e-05</b> | .20<br>SE=.053<br>p=2.0e-04<br>F=9.3e-08 |
| <b>ANOVA<br/>F-statistic<br/>Dominant</b>  | -6.21<br>SE=.56<br>p=<2.2e-16<br>F=<2.2e-16  | .213<br>SE=.071<br>p=2.8e-03<br>F=1.9e-05       | .19<br>SE=.085<br>p=.024<br>F=6.3e-05           | .029<br>SE=.031<br>p=.034<br>F=.042              | .20<br>SE=.085<br>p=.018<br>F=5.1e-05    |
| <b>AIC<br/>Additive</b>                    | <b>1403.8</b>                                | <b>251.2</b>                                    | <b>343.4</b>                                    | <b>-229</b>                                      | <b>373</b>                               |
| <b>AIC<br/>Recessive</b>                   | 1443                                         | <b>249.2</b>                                    | <b>341.1</b>                                    | <b>-230.3</b>                                    | <b>371.7</b>                             |
| <b>AIC<br/>Dominant</b>                    | 1521.3                                       | 279.5                                           | 364.5                                           | -216.9                                           | 390                                      |
| <b>AIC<br/>Co-Dominant</b>                 | 1584.9                                       | 267.2                                           | 352.3                                           | -220.7                                           | 389.9                                    |

**Supplemental Table 5: ANOVA results and Akaike information criterion (AIC) values for models of inheritance between the *HMG2* c.83G>A variant and height and the four EMS traits significantly correlated with genotype.** ANOVA results and AIC values for models of inheritance between the *HMG2* c.83G>A variant and height and the four EMS traits significantly correlated with genotype. Deciding values are highlighted in red. For height, an additive model was the best fit model (lowest AIC). For the EMS traits, p-value for the f-statistic slightly favored the recessive model but the AIC could not differentiate between a recessive and additive model. For example, the AIC for the recessive insulin model was 249.2 and 251.2 for the additive model, which can be interpreted as the additive model being 0.36 [ $\exp^{-(249.2-251.2)/2}$ ] times as likely as the recessive model, concluding that there is insufficient information to support picking either model. Abbreviations: INS-OST = insulin post oral sugar test, NEFA = non-esterified fatty acids.

| <b>Axiom MCEc2M SNP ID</b> | <b>EquCab2 BP Location</b> | <b>EquCab3 BP Location</b> | <b>Di</b> | <b>Height Assoc.</b> | <b>Insulin Assoc.</b> |
|----------------------------|----------------------------|----------------------------|-----------|----------------------|-----------------------|
| MNEc.2.6.80499826.PC       | 80499826                   | 81667046                   |           |                      |                       |
| MNEc.2.6.80501042.PC       | 80501042                   | 81668273                   |           |                      |                       |
| MNEc.2.6.80501273.PC       | 80501273                   | 81668520                   |           | X                    |                       |
| MNEc.2.6.80502406.PC       | 80502406                   | 81669653                   |           |                      |                       |
| MNEc.2.6.80503522.PC       | 80503522                   | 81670789                   |           |                      |                       |
| MNEc.2.6.80503614.PC       | 80503614                   | 81670881                   |           |                      |                       |
| MNEc.2.6.80503671.PC       | 80503671                   | 81670938                   |           |                      |                       |
| MNEc.2.6.80504332.PC       | 80504332                   | 81671599                   |           |                      |                       |
| MNEc.2.6.80504637.PC       | 80504637                   | 81671904                   |           |                      |                       |
| MNEc.2.6.80504799.PC       | 80504799                   | 81672066                   |           |                      |                       |
| MNEc.2.6.80505411.PC       | 80505411                   | 81672678                   |           |                      |                       |
| MNEc.2.6.80509032.PC       | 80509032                   | 81676297                   |           |                      |                       |
| MNEc.2.6.80512076.PC       | 80512076                   | 81679341                   |           |                      |                       |
| MNEc.2.6.80512513.PC       | 80512513                   | 81679778                   |           |                      |                       |
| MNEc.2.6.80513598.PC       | 80513598                   | 81680863                   |           |                      |                       |
| MNEc.2.6.80515954.PC       | 80515954                   | 81683219                   |           |                      |                       |
| MNEc.2.6.80516105.PC       | 80516105                   | 81683370                   |           |                      |                       |
| MNEc.2.6.80516221.PC       | 80516221                   | 81683486                   |           |                      |                       |
| MNEc.2.6.80518479.PC       | 80518479                   | 81685747                   |           |                      |                       |
| MNEc.2.6.80518512.PC       | 80518512                   | 81685780                   |           |                      |                       |
| MNEc.2.6.80518693.PC       | 80518693                   | 81685961                   |           |                      |                       |
| MNEc.2.6.80520101.PC       | 80520101                   | 81687369                   |           | X                    |                       |
| MNEc.2.6.80521407.PC       | 80521407                   | 81688626                   |           |                      |                       |
| MNEc.2.6.80522351.PC       | 80522351                   | 81689570                   |           | X                    |                       |
| MNEc.2.6.80523773.PC       | 80523773                   | 81690992                   |           |                      |                       |
| MNEc.2.6.80527094.PC       | 80527094                   | 81694313                   |           | X                    |                       |
| MNEc.2.6.80527223.PC       | 80527223                   | 81694442                   |           |                      |                       |
| MNEc.2.6.80527481.PC       | 80527481                   | 81694700                   |           |                      |                       |
| MNEc.2.6.80533180.PC       | 80533180                   | 81700398                   |           |                      |                       |
| MNEc.2.6.80533647.PC       | 80533647                   | 81700865                   |           |                      |                       |
| MNEc.2.6.80544097.PC       | 80544097                   | 81711319                   |           |                      |                       |
| MNEc.2.6.80545253.PC       | 80545253                   | 81712475                   |           |                      |                       |
| MNEc.2.6.80545309.PC       | 80545309                   | 81712531                   |           |                      |                       |
| MNEc.2.6.80548131.PC       | 80548131                   | 81715353                   |           |                      |                       |
| MNEc.2.6.80554792.PC       | 80554792                   | 81722014                   |           |                      |                       |
| MNEc.2.6.80555907.PC       | 80555907                   | 81723129                   |           |                      |                       |
| MNEc.2.6.80557468.PC       | 80557468                   | 81724690                   |           |                      |                       |
| MNEc.2.6.80564229.PC       | 80564229                   | 81731412                   |           |                      |                       |
| MNEc.2.6.80567345.PC       | 80567345                   | 81734532                   |           |                      |                       |
| MNEc.2.6.80567618.PC       | 80567618                   | 81734805                   |           |                      |                       |
| MNEc.2.6.80568218.PC       | 80568218                   | 81735405                   |           |                      |                       |
| MNEc.2.6.80569235.PC       | 80569235                   | 81736422                   |           |                      |                       |
| MNEc.2.6.80569293.PC       | 80569293                   | 81736480                   |           |                      |                       |
| MNEc.2.6.80569852.PC       | 80569852                   | 81737039                   |           |                      |                       |
| MNEc.2.6.80570298.PC       | 80570298                   | 81737485                   |           | X                    |                       |
| MNEc.2.6.80572371.PC       | 80572371                   | 81739554                   |           |                      |                       |
| MNEc.2.6.80572584.PC       | 80572584                   | 81739767                   |           |                      |                       |
| MNEc.2.6.80574750.PC       | 80574750                   | 81741935                   |           |                      |                       |
| MNEc.2.6.80574793.PC       | 80574793                   | 81741978                   |           |                      |                       |
| MNEc.2.6.80575672.PC       | 80575672                   | 81742857                   |           |                      |                       |
| MNEc.2.6.80576028.PC       | 80576028                   | 81743213                   |           |                      |                       |

| <b>Axiom MCEc2M SNP ID</b>      | <b>EquCab2 BP Location</b> | <b>EquCab3 BP Location</b> | <b>Di</b> | <b>Height Assoc.</b> | <b>Insulin Assoc.</b> |
|---------------------------------|----------------------------|----------------------------|-----------|----------------------|-----------------------|
| MNEc.2.6.80579951.BIEC2-1023886 | 80579951                   | 81747136                   |           |                      |                       |
| MNEc.2.6.80580074.PC            | 80580074                   | 81747259                   |           |                      |                       |
| MNEc.2.6.80580136.PC            | 80580136                   | 81747321                   |           |                      |                       |
| MNEc.2.6.80580526.PC            | 80580526                   | 81747711                   |           |                      |                       |
| MNEc.2.6.80580756.PC            | 80580756                   | 81747941                   |           |                      |                       |
| MNEc.2.6.80582308.PC            | 80582308                   | 81749493                   |           |                      |                       |
| MNEc.2.6.80582595.PC            | 80582595                   | 81749780                   |           |                      |                       |
| MNEc.2.6.80585781.PC            | 80585781                   | 81752969                   |           |                      |                       |
| MNEc.2.6.80586564.PC            | 80586564                   | 81753752                   |           |                      |                       |
| MNEc.2.6.80587550.PC            | 80587550                   | 81754738                   |           |                      |                       |
| MNEc.2.6.80592143.PC            | 80592143                   | 81759332                   |           |                      |                       |
| MNEc.2.6.80592392.PC            | 80592392                   | 81759581                   |           |                      |                       |
| MNEc.2.6.80597639.PC            | 80597639                   | 81764830                   |           |                      |                       |
| MNEc.2.6.80597710.PC            | 80597710                   | 81764901                   |           |                      |                       |
| MNEc.2.6.80598790.PC            | 80598790                   | 81765981                   |           |                      |                       |
| MNEc.2.6.80599081.PC            | 80599081                   | 81766272                   |           |                      |                       |
| MNEc.2.6.80599420.PC            | 80599420                   | 81766612                   |           |                      |                       |
| MNEc.2.6.80602873.PC            | 80602873                   | 81770065                   |           |                      |                       |
| MNEc.2.6.80605857.PC            | 80605857                   | 81773049                   |           | X                    |                       |
| MNEc.2.6.80608356.PC            | 80608356                   | 81775548                   |           |                      |                       |
| MNEc.2.6.80609214.PC            | 80609214                   | 81776406                   |           |                      |                       |
| MNEc.2.6.80613296.PC            | 80613296                   | 81780489                   |           |                      |                       |
| MNEc.2.6.80613431.PC            | 80613431                   | 81780624                   |           |                      |                       |
| MNEc.2.6.80617709.PC            | 80617709                   | 81784902                   |           |                      |                       |
| MNEc.2.6.80619822.PC            | 80619822                   | 81787015                   |           |                      |                       |
| MNEc.2.6.80620304.PC            | 80620304                   | 81787497                   |           |                      |                       |
| MNEc.2.6.80620478.PC            | 80620478                   | 81787671                   |           |                      |                       |
| MNEc.2.6.80620792.BIEC2-1023912 | 80620792                   | 81787985                   |           |                      |                       |
| MNEc.2.6.80621253.PC            | 80621253                   | 81788446                   |           |                      |                       |
| MNEc.2.6.80621281.PC            | 80621281                   | 81788474                   |           |                      |                       |
| MNEc.2.6.80622121.PC            | 80622121                   | 81789314                   |           |                      |                       |
| MNEc.2.6.80622788.PC            | 80622788                   | 81789981                   |           |                      |                       |
| MNEc.2.6.80623531.PC            | 80623531                   | 81790724                   |           |                      |                       |
| MNEc.2.6.80625415.PC            | 80625415                   | 81792608                   |           |                      |                       |
| MNEc.2.6.80625991.PC            | 80625991                   | 81793184                   |           |                      |                       |
| MNEc.2.6.80627668.PC            | 80627668                   | 81794861                   |           |                      |                       |
| MNEc.2.6.80628078.PC            | 80628078                   | 81795271                   |           |                      |                       |
| MNEc.2.6.80634102.PC            | 80634102                   | 81801300                   |           | X                    |                       |
| MNEc.2.6.80635142.PC            | 80635142                   | 81802340                   |           |                      |                       |
| MNEc.2.6.80636041.PC            | 80636041                   | 81803239                   |           | X                    |                       |
| MNEc.2.6.80636779.PC            | 80636779                   | 81803977                   |           |                      |                       |
| MNEc.2.6.80639056.PC            | 80639056                   | 81806255                   |           |                      |                       |
| MNEc.2.6.80639161.PC            | 80639161                   | 81806360                   |           |                      |                       |
| MNEc.2.6.80639787.BIEC2-1023925 | 80639787                   | 81806986                   |           | X                    | X                     |
| MNEc.2.6.80639984.PC            | 80639984                   | 81807183                   |           |                      |                       |
| MNEc.2.6.80640275.PC            | 80640275                   | 81807474                   |           |                      |                       |
| MNEc.2.6.80642478.PC            | 80642478                   | 81809677                   |           |                      |                       |
| MNEc.2.6.80648966.PC            | 80648966                   | 81816165                   |           |                      |                       |
| MNEc.2.6.80649778.PC            | 80649778                   | 81816951                   |           |                      |                       |
| MNEc.2.6.80651081.PC            | 80651081                   | 81818254                   |           |                      |                       |
| MNEc.2.6.80651346.PC            | 80651346                   | 81818519                   |           |                      |                       |



| <b>Axiom MCEc2M SNP ID</b> | <b>EquCab2 BP Location</b> | <b>EquCab3 BP Location</b> | <b>Di</b> | <b>Height Assoc.</b> | <b>Insulin Assoc.</b> |
|----------------------------|----------------------------|----------------------------|-----------|----------------------|-----------------------|
| MNEc.2.6.80654729.PC       | 80654729                   | 81821902                   |           |                      |                       |
| MNEc.2.6.80655300.PC       | 80655300                   | 81822473                   |           |                      |                       |
| MNEc.2.6.80656692.PC       | 80656692                   | 81823865                   |           | X                    |                       |
| MNEc.2.6.80657480.PC       | 80657480                   | 81824653                   |           |                      |                       |
| MNEc.2.6.80658576.PC       | 80658576                   | 81825749                   |           | X                    |                       |
| MNEc.2.6.80659413.PC       | 80659413                   | 81826586                   |           |                      |                       |
| MNEc.2.6.80659646.PC       | 80659646                   | 81826819                   |           |                      |                       |
| MNEc.2.6.80659981.PC       | 80659981                   | 81827154                   |           |                      |                       |
| MNEc.2.6.80660228.PC       | 80660228                   | 81827401                   |           |                      |                       |
| MNEc.2.6.80663069.PC       | 80663069                   | 81830242                   |           |                      |                       |
| MNEc.2.6.80666273.PC       | 80666273                   | 81833447                   |           |                      |                       |
| MNEc.2.6.80666491.PC       | 80666491                   | 81833665                   |           |                      |                       |
| MNEc.2.6.80670901.PC       | 80670901                   | 81838075                   |           |                      |                       |
| MNEc.2.6.80672874.PC       | 80672874                   | 81840048                   |           |                      |                       |
| MNEc.2.6.80674503.PC       | 80674503                   | 81841677                   |           |                      |                       |
| MNEc.2.6.80678320.PC       | 80678320                   | 81845492                   |           |                      |                       |
| MNEc.2.6.80681512.PC       | 80681512                   | 81848686                   |           |                      |                       |
| MNEc.2.6.80684153.PC       | 80684153                   | 81851327                   |           |                      |                       |
| MNEc.2.6.80686536.PC       | 80686536                   | 81853710                   |           |                      |                       |
| MNEc.2.6.80686702.PC       | 80686702                   | 81853876                   |           |                      |                       |
| MNEc.2.6.80688324.PC       | 80688324                   | 81855498                   |           | X                    |                       |
| MNEc.2.6.80692551.PC       | 80692551                   | 81859725                   |           |                      |                       |
| MNEc.2.6.80694638.PC       | 80694638                   | 81861812                   |           |                      |                       |
| MNEc.2.6.80694729.PC       | 80694729                   | 81861903                   |           |                      |                       |
| MNEc.2.6.80697067.PC       | 80697067                   | 81864242                   |           |                      |                       |
| MNEc.2.6.80697327.PC       | 80697327                   | 81864502                   |           |                      |                       |
| MNEc.2.6.80700969.PC       | 80700969                   | 81868144                   |           |                      |                       |
| MNEc.2.6.80701317.PC       | 80701317                   | 81868492                   |           |                      |                       |
| MNEc.2.6.80701518.PC       | 80701518                   | 81868693                   |           | X                    |                       |
| MNEc.2.6.80702649.PC       | 80702649                   | 81869824                   |           |                      |                       |
| MNEc.2.6.80703890.PC       | 80703890                   | 81871065                   |           |                      |                       |
| MNEc.2.6.80708442.PC       | 80708442                   | 81875617                   |           |                      |                       |
| MNEc.2.6.80710843.PC       | 80710843                   | 81878018                   |           |                      |                       |
| MNEc.2.6.80714065.PC       | 80714065                   | 81881240                   |           |                      |                       |
| MNEc.2.6.80715143.PC       | 80715143                   | 81882318                   |           |                      |                       |
| MNEc.2.6.80719193.PC       | 80719193                   | 81886368                   |           |                      |                       |
| MNEc.2.6.80722266.PC       | 80722266                   | 81889441                   |           |                      |                       |
| MNEc.2.6.80722564.PC       | 80722564                   | 81889739                   |           |                      |                       |
| MNEc.2.6.80722978.PC       | 80722978                   | 81890153                   |           |                      |                       |
| MNEc.2.6.80724746.PC       | 80724746                   | 81891921                   |           |                      |                       |
| MNEc.2.6.80728189.PC       | 80728189                   | 81895365                   |           |                      |                       |
| MNEc.2.6.80728297.PC       | 80728297                   | 81895473                   |           |                      |                       |
| MNEc.2.6.80729934.PC       | 80729934                   | 81897110                   |           |                      |                       |
| MNEc.2.6.80732384.PC       | 80732384                   | 81899560                   |           |                      |                       |
| MNEc.2.6.80733830.PC       | 80733830                   | 81901006                   |           |                      |                       |
| MNEc.2.6.80736496.PC       | 80736496                   | 81903675                   |           |                      |                       |
| MNEc.2.6.80740274.PC       | 80740274                   | 81907453                   |           |                      |                       |
| MNEc.2.6.80740392.PC       | 80740392                   | 81907571                   |           |                      |                       |
| MNEc.2.6.80742798.PC       | 80742798                   | 81909977                   |           |                      |                       |
| MNEc.2.6.80742855.PC       | 80742855                   | 81910034                   |           |                      |                       |
| MNEc.2.6.80744646.PC       | 80744646                   | 81911825                   |           |                      |                       |

| <b>Axiom MCEc2M SNP ID</b>       | <b>EquCab2 BP Location</b> | <b>EquCab3 BP Location</b> | <b>Di</b> | <b>Height Assoc.</b> | <b>Insulin Assoc.</b> |
|----------------------------------|----------------------------|----------------------------|-----------|----------------------|-----------------------|
| MNEc.2.6.80745841.BIEC2-1023976  | 80745841                   | 81913021                   |           |                      |                       |
| MNEc.2.6.80746678.PC             | 80746678                   | 81913858                   |           |                      |                       |
| MNEc.2.6.80747017.PC             | 80747017                   | 81914197                   |           |                      |                       |
| MNEc.2.6.80753124.PC             | 80753124                   | 81920304                   |           |                      |                       |
| MNEc.2.6.80753306.TBIEC2-1023979 | 80753306                   | 81920486                   |           |                      |                       |
| MNEc.2.6.80756605.PC             | 80756605                   | 81923785                   |           |                      |                       |
| MNEc.2.6.80756667.PC             | 80756667                   | 81923847                   |           |                      |                       |
| MNEc.2.6.80758159.PC             | 80758159                   | 81925341                   |           |                      |                       |
| MNEc.2.6.80758193.PC             | 80758193                   | 81925375                   |           |                      |                       |
| MNEc.2.6.80759692.PC             | 80759692                   | 81926874                   |           |                      |                       |
| MNEc.2.6.80763018.PC             | 80763018                   | 81930200                   |           |                      |                       |
| MNEc.2.6.80763384.PC             | 80763384                   | 81930566                   |           |                      |                       |
| MNEc.2.6.80763601.PC             | 80763601                   | 81930783                   |           |                      |                       |
| MNEc.2.6.80763751.PC             | 80763751                   | 81930933                   |           |                      |                       |
| MNEc.2.6.80766863.PC             | 80766863                   | 81934045                   |           |                      |                       |
| MNEc.2.6.80767981.PC             | 80767981                   | 81935160                   |           |                      |                       |
| MNEc.2.6.80768143.PC             | 80768143                   | 81935322                   |           |                      |                       |
| MNEc.2.6.80770476.PC             | 80770476                   | 81937655                   |           |                      |                       |
| MNEc.2.6.80772574.PC             | 80772574                   | 81939753                   |           |                      |                       |
| MNEc.2.6.80773747.PC             | 80773747                   | 81940926                   |           |                      |                       |
| MNEc.2.6.80783645.PC             | 80783645                   | 81950822                   |           |                      |                       |
| MNEc.2.6.80784128.PC             | 80784128                   | 81951305                   |           | X                    |                       |
| MNEc.2.6.80785871.PC             | 80785871                   | 81953011                   |           |                      |                       |
| MNEc.2.6.80786333.PC             | 80786333                   | 81953473                   |           |                      |                       |
| MNEc.2.6.80787590.PC             | 80787590                   | 81954730                   |           |                      |                       |
| MNEc.2.6.80787822.PC             | 80787822                   | 81954962                   |           |                      |                       |
| MNEc.2.6.80790795.PC             | 80790795                   | 81957936                   |           |                      |                       |
| MNEc.2.6.80792111.TBIEC2-1023986 | 80792111                   | 81959252                   |           |                      |                       |
| MNEc.2.6.80792181.TBIEC2-1023987 | 80792181                   | 81959322                   |           |                      |                       |
| MNEc.2.6.80793324.PC             | 80793324                   | 81960465                   |           |                      |                       |
| MNEc.2.6.80794944.PC             | 80794944                   | 81962085                   |           |                      |                       |
| MNEc.2.6.80795347.PC             | 80795347                   | 81962488                   |           |                      | X                     |
| MNEc.2.6.80795503.PC             | 80795503                   | 81962644                   |           |                      |                       |
| MNEc.2.6.80796963.PC             | 80796963                   | 81964104                   |           |                      |                       |
| MNEc.2.6.80797343.PC             | 80797343                   | 81964484                   |           |                      |                       |
| MNEc.2.6.80801661.PC             | 80801661                   | 81968699                   |           |                      |                       |
| MNEc.2.6.80802867.PC             | 80802867                   | 81969905                   |           |                      |                       |
| MNEc.2.6.80806293.PC             | 80806293                   | 81973331                   |           |                      |                       |
| MNEc.2.6.80806580.PC             | 80806580                   | 81973618                   |           | X                    |                       |
| MNEc.2.6.80807204.PC             | 80807204                   | 81974242                   |           |                      |                       |
| MNEc.2.6.80815186.PC             | 80815186                   | 81982237                   |           |                      |                       |
| MNEc.2.6.80815571.PC             | 80815571                   | 81982623                   |           |                      |                       |
| MNEc.2.6.80817011.PC             | 80817011                   | 81984046                   |           |                      |                       |
| MNEc.2.6.80818111.PC             | 80818111                   | 81985146                   |           |                      |                       |
| MNEc.2.6.80819060.PC             | 80819060                   | 81986095                   |           |                      |                       |
| MNEc.2.6.80820491.PC             | 80820491                   | 81987526                   |           |                      |                       |
| MNEc.2.6.80821993.PC             | 80821993                   | 81989028                   |           |                      |                       |
| MNEc.2.6.80824601.PC             | 80824601                   | 81991636                   |           | X                    |                       |
| MNEc.2.6.80830385.PC             | 80830385                   | 81997419                   |           |                      |                       |
| MNEc.2.6.80830446.PC             | 80830446                   | 81997480                   |           |                      |                       |
| MNEc.2.6.80831282.PC             | 80831282                   | 81998316                   |           |                      |                       |

| <b>Axiom MCEc2M SNP ID</b>      | <b>EquCab2 BP Location</b> | <b>EquCab3 BP Location</b> | <b>Di</b> | <b>Height Assoc.</b> | <b>Insulin Assoc.</b> |
|---------------------------------|----------------------------|----------------------------|-----------|----------------------|-----------------------|
| MNEc.2.6.80832084.PC            | 80832084                   | 81999118                   |           |                      | X                     |
| MNEc.2.6.80832207.PC            | 80832207                   | 81999241                   |           |                      |                       |
| MNEc.2.6.80833819.PC            | 80833819                   | 82000854                   |           |                      |                       |
| MNEc.2.6.80834462.PC            | 80834462                   | 82001497                   |           |                      |                       |
| MNEc.2.6.80834740.PC            | 80834740                   | 82001775                   |           | X                    |                       |
| MNEc.2.6.80837012.PC            | 80837012                   | 82004048                   |           |                      |                       |
| MNEc.2.6.80837085.PC            | 80837085                   | 82004121                   |           |                      |                       |
| MNEc.2.6.80842128.PC            | 80842128                   | 82009162                   |           |                      |                       |
| MNEc.2.6.80842603.PC            | 80842603                   | 82009637                   |           |                      |                       |
| MNEc.2.6.80844424.PC            | 80844424                   | 82011458                   |           | X                    |                       |
| MNEc.2.6.80844664.PC            | 80844664                   | 82011698                   |           | X                    |                       |
| MNEc.2.6.80846341.PC            | 80846341                   | 82013375                   |           |                      | X                     |
| MNEc.2.6.80846756.PC            | 80846756                   | 82013790                   |           |                      |                       |
| MNEc.2.6.80848712.PC            | 80848712                   | 82015746                   |           | X                    |                       |
| MNEc.2.6.80849310.PC            | 80849310                   | 82016344                   |           |                      |                       |
| MNEc.2.6.80849467.PC            | 80849467                   | 82016501                   |           |                      |                       |
| MNEc.2.6.80850749.PC            | 80850749                   | 82017783                   |           |                      |                       |
| MNEc.2.6.80851196.BIEC2-1024008 | 80851196                   | 82018230                   |           |                      |                       |
| MNEc.2.6.80855422.PC            | 80855422                   | 82022458                   |           |                      |                       |
| MNEc.2.6.80859332.PC            | 80859332                   | 82026311                   |           |                      |                       |
| MNEc.2.6.80859678.PC            | 80859678                   | 82026657                   |           |                      |                       |
| MNEc.2.6.80861680.PC            | 80861680                   | 82028659                   |           |                      |                       |
| MNEc.2.6.80862656.PC            | 80862656                   | 82029635                   |           |                      |                       |
| MNEc.2.6.80863356.PC            | 80863356                   | 82030335                   |           |                      | X                     |
| MNEc.2.6.80864497.PC            | 80864497                   | 82031476                   |           |                      |                       |
| MNEc.2.6.80865169.PC            | 80865169                   | 82032148                   |           |                      |                       |
| MNEc.2.6.80865774.PC            | 80865774                   | 82032753                   |           | X                    |                       |
| MNEc.2.6.80865916.PC            | 80865916                   | 82032895                   |           |                      |                       |
| MNEc.2.6.80867332.PC            | 80867332                   | 82034311                   |           |                      |                       |
| MNEc.2.6.80867552.PC            | 80867552                   | 82034531                   |           |                      |                       |
| MNEc.2.6.80868281.PC            | 80868281                   | 82035260                   |           |                      |                       |
| MNEc.2.6.80868393.PC            | 80868393                   | 82035372                   |           |                      |                       |
| MNEc.2.6.80870148.PC            | 80870148                   | NA                         |           |                      |                       |
| MNEc.2.6.80871158.PC            | 80871158                   | NA                         |           |                      |                       |
| MNEc.2.6.80872239.PC            | 80872239                   | NA                         |           |                      |                       |
| MNEc.2.6.80873525.PC            | 80873525                   | 82037961                   |           |                      |                       |
| MNEc.2.6.80877589.PC            | 80877589                   | 82042029                   |           |                      |                       |
| MNEc.2.6.80879383.PC            | 80879383                   | 82043822                   |           |                      |                       |
| MNEc.2.6.80879864.PC            | 80879864                   | 82044303                   |           |                      |                       |
| MNEc.2.6.80883323.PC            | 80883323                   | 82047762                   |           |                      |                       |
| MNEc.2.6.80885397.PC            | 80885397                   | 82049836                   |           |                      | X                     |
| MNEc.2.6.80887049.PC            | 80887049                   | 82051488                   |           |                      |                       |
| MNEc.2.6.80889551.PC            | 80889551                   | 82053990                   |           |                      |                       |
| MNEc.2.6.80890927.PC            | 80890927                   | 82055366                   |           |                      |                       |
| MNEc.2.6.80891737.PC            | 80891737                   | 82056176                   |           |                      |                       |
| MNEc.2.6.80893186.PC            | 80893186                   | 82057625                   |           |                      |                       |
| MNEc.2.6.80893468.PC            | 80893468                   | 82057907                   |           |                      |                       |
| MNEc.2.6.80900288.PC            | 80900288                   | 82064728                   |           |                      |                       |
| MNEc.2.6.80902137.PC            | 80902137                   | 82066602                   |           |                      |                       |
| MNEc.2.6.80902997.PC            | 80902997                   | 82067462                   |           |                      |                       |
| MNEc.2.6.80903581.PC            | 80903581                   | 82068046                   |           |                      |                       |

| <b>Axiom MCEc2M SNP ID</b>      | <b>EquCab2 BP Location</b> | <b>EquCab3 BP Location</b> | <b>Di</b> | <b>Height Assoc.</b> | <b>Insulin Assoc.</b> |
|---------------------------------|----------------------------|----------------------------|-----------|----------------------|-----------------------|
| MNEc.2.6.80907156.PC            | 80907156                   | 82071589                   |           |                      |                       |
| MNEc.2.6.80911139.PC            | 80911139                   | 82075571                   |           |                      |                       |
| MNEc.2.6.80915201.PC            | 80915201                   | 82079633                   |           |                      |                       |
| MNEc.2.6.80915493.PC            | 80915493                   | 82079925                   |           |                      |                       |
| MNEc.2.6.80915581.PC            | 80915581                   | 82080013                   |           | X                    |                       |
| MNEc.2.6.80917882.PC            | 80917882                   | 82082314                   |           |                      |                       |
| MNEc.2.6.80919604.PC            | 80919604                   | 82084036                   |           |                      | X                     |
| MNEc.2.6.80919807.PC            | 80919807                   | 82084239                   |           |                      |                       |
| MNEc.2.6.80920347.BIEC2-1024023 | 80920347                   | 82084779                   |           |                      |                       |
| MNEc.2.6.80926065.PC            | 80926065                   | 82090497                   |           |                      |                       |
| MNEc.2.6.80928463.PC            | 80928463                   | 82092895                   |           |                      |                       |
| MNEc.2.6.80929172.PC            | 80929172                   | 82093604                   |           |                      |                       |
| MNEc.2.6.80931312.PC            | 80931312                   | 82095763                   |           |                      |                       |
| MNEc.2.6.80933091.PC            | 80933091                   | 82097541                   |           |                      |                       |
| MNEc.2.6.80933683.PC            | 80933683                   | 82098133                   |           |                      |                       |
| MNEc.2.6.80933998.PC            | 80933998                   | 82098448                   |           |                      |                       |
| MNEc.2.6.80935302.PC            | 80935302                   | 82099752                   |           |                      |                       |
| MNEc.2.6.80935813.PC            | 80935813                   | 82100263                   |           | X                    |                       |
| MNEc.2.6.80937306.PC            | 80937306                   | 82101756                   |           |                      |                       |
| MNEc.2.6.80939857.PC            | 80939857                   | 82104307                   |           |                      |                       |
| MNEc.2.6.80940129.PC            | 80940129                   | 82104579                   |           |                      |                       |
| MNEc.2.6.80942635.PC            | 80942635                   | 82107085                   |           |                      |                       |
| MNEc.2.6.80944105.PC            | 80944105                   | 82108555                   |           |                      |                       |
| MNEc.2.6.80945451.PC            | 80945451                   | 82109901                   |           |                      |                       |
| MNEc.2.6.80948795.PC            | 80948795                   | 82113239                   |           |                      |                       |
| MNEc.2.6.80948817.PC            | 80948817                   | 82113261                   |           |                      |                       |
| MNEc.2.6.80950340.PC            | 80950340                   | 82114784                   |           |                      | X                     |
| MNEc.2.6.80958104.PC            | 80958104                   | 82122537                   |           |                      |                       |
| MNEc.2.6.80958180.PC            | 80958180                   | 82122613                   |           |                      |                       |
| MNEc.2.6.80959050.PC            | 80959050                   | 82123482                   |           |                      |                       |
| MNEc.2.6.80960411.PC            | 80960411                   | 82124573                   |           |                      |                       |
| MNEc.2.6.80960850.PC            | 80960850                   | 82125012                   |           |                      |                       |
| MNEc.2.6.80961489.PC            | 80961489                   | 82125651                   |           | X                    |                       |
| MNEc.2.6.80964432.PC            | 80964432                   | 82128595                   |           | X                    |                       |
| MNEc.2.6.80968716.PC            | 80968716                   | 82132880                   |           |                      |                       |
| MNEc.2.6.80969726.PC            | 80969726                   | 82133890                   |           |                      |                       |
| MNEc.2.6.80971088.PC            | 80971088                   | 82135252                   |           | X                    |                       |
| MNEc.2.6.80971929.PC            | 80971929                   | 82136093                   |           |                      |                       |
| MNEc.2.6.80976137.PC            | 80976137                   | 82140301                   |           | X                    |                       |
| MNEc.2.6.80976600.PC            | 80976600                   | 82140764                   |           |                      |                       |
| MNEc.2.6.80976721.PC            | 80976721                   | 82140885                   |           |                      |                       |
| MNEc.2.6.80977285.PC            | 80977285                   | 82141449                   |           |                      |                       |
| MNEc.2.6.80977751.PC            | 80977751                   | 82141915                   |           |                      |                       |
| MNEc.2.6.80979433.PC            | 80979433                   | 82143597                   |           |                      |                       |
| MNEc.2.6.80980590.PC            | 80980590                   | 82144754                   |           |                      |                       |
| MNEc.2.6.80981134.PC            | 80981134                   | 82145298                   |           |                      |                       |
| MNEc.2.6.80981470.PC            | 80981470                   | 82145634                   |           |                      |                       |
| MNEc.2.6.80981691.PC            | 80981691                   | 82145855                   |           |                      |                       |
| MNEc.2.6.80984945.PC            | 80984945                   | 82149109                   |           |                      |                       |
| MNEc.2.6.80985350.PC            | 80985350                   | 82149514                   |           |                      |                       |
| MNEc.2.6.80987560.PC            | 80987560                   | 82151724                   |           |                      |                       |

| <b>Axiom MCEc2M SNP ID</b>      | <b>EquCab2 BP Location</b> | <b>EquCab3 BP Location</b> | <b>Di</b> | <b>Height Assoc.</b> | <b>Insulin Assoc.</b> |
|---------------------------------|----------------------------|----------------------------|-----------|----------------------|-----------------------|
| MNEc.2.6.80988998.PC            | 80988998                   | 82153162                   |           |                      |                       |
| MNEc.2.6.80989356.PC            | 80989356                   | 82153520                   | X         |                      |                       |
| MNEc.2.6.80994247.PC            | 80994247                   | 82158411                   | X         |                      |                       |
| MNEc.2.6.81000288.PC            | 81000288                   | 82164452                   | X         | X                    |                       |
| MNEc.2.6.81001292.BIEC2-1024061 | 81001292                   | 82165456                   | X         |                      |                       |
| MNEc.2.6.81001824.PC            | 81001824                   | 82165988                   | X         | X                    |                       |
| MNEc.2.6.81004640.PC            | 81004640                   | 82168804                   | X         | X                    |                       |
| MNEc.2.6.81004787.BIEC2-1024064 | 81004787                   | 82168951                   | X         |                      |                       |
| MNEc.2.6.81004845.PC            | 81004845                   | 82169009                   | X         |                      |                       |
| MNEc.2.6.81005329.PC            | 81005329                   | 82169493                   | X         |                      |                       |
| MNEc.2.6.81011612.PC            | 81011612                   | 82175776                   |           | X                    |                       |
| MNEc.2.6.81011857.PC            | 81011857                   | 82176021                   |           |                      |                       |
| MNEc.2.6.81012766.PC            | 81012766                   | 82176930                   |           |                      |                       |
| MNEc.2.6.81014209.PC            | 81014209                   | 82178374                   |           |                      |                       |
| MNEc.2.6.81018173.PC            | 81018173                   | 82182338                   |           |                      |                       |
| MNEc.2.6.81024712.PC            | 81024712                   | 82188877                   |           |                      |                       |
| MNEc.2.6.81028211.PC            | 81028211                   | 82192376                   |           |                      |                       |
| MNEc.2.6.81028417.PC            | 81028417                   | 82192582                   |           |                      |                       |
| MNEc.2.6.81029280.PC            | 81029280                   | 82193445                   |           |                      |                       |
| MNEc.2.6.81030458.PC            | 81030458                   | 82194623                   |           |                      |                       |
| MNEc.2.6.81040675.PC            | 81040675                   | 82204840                   |           |                      |                       |
| MNEc.2.6.81040813.PC            | 81040813                   | 82204978                   |           |                      |                       |
| MNEc.2.6.81040860.PC            | 81040860                   | 82205025                   |           | X                    |                       |
| MNEc.2.6.81041470.PC            | 81041470                   | 82205635                   |           |                      |                       |
| MNEc.2.6.81041826.PC            | 81041826                   | 82205991                   |           |                      |                       |
| MNEc.2.6.81044828.PC            | 81044828                   | 82208993                   |           |                      |                       |
| MNEc.2.6.81046539.PC            | 81046539                   | 82210704                   |           |                      |                       |
| MNEc.2.6.81047385.PC            | 81047385                   | 82211550                   |           |                      |                       |
| MNEc.2.6.81048067.PC            | 81048067                   | 82212232                   |           |                      |                       |
| MNEc.2.6.81050533.PC            | 81050533                   | 82214698                   |           |                      |                       |
| MNEc.2.6.81053351.PC            | 81053351                   | 82217515                   |           |                      |                       |
| MNEc.2.6.81056567.PC            | 81056567                   | 82220731                   |           |                      |                       |
| MNEc.2.6.81057502.PC            | 81057502                   | 82221666                   |           |                      |                       |
| MNEc.2.6.81060020.PC            | 81060020                   | 82224184                   |           |                      |                       |
| MNEc.2.6.81066572.PC            | 81066572                   | 82230736                   |           | X                    | X                     |
| MNEc.2.6.81072276.PC            | 81072276                   | 82236440                   |           |                      |                       |
| MNEc.2.6.81074062.PC            | 81074062                   | 82238227                   |           |                      |                       |
| MNEc.2.6.81074150.PC            | 81074150                   | 82238315                   |           |                      |                       |
| MNEc.2.6.81074374.PC            | 81074374                   | 82238539                   |           | X                    |                       |
| MNEc.2.6.81074650.PC            | 81074650                   | 82238815                   |           | X                    |                       |
| MNEc.2.6.81077322.PC            | 81077322                   | 82241487                   |           |                      |                       |
| MNEc.2.6.81082719.PC            | 81082719                   | 82246884                   |           | X                    |                       |
| MNEc.2.6.81084493.PC            | 81084493                   | 82248658                   |           |                      |                       |
| MNEc.2.6.81084746.PC            | 81084746                   | 82248911                   |           |                      |                       |
| MNEc.2.6.81085399.PC            | 81085399                   | 82249564                   |           | X                    | X                     |
| MNEc.2.6.81086049.PC            | 81086049                   | 82250226                   |           |                      |                       |
| MNEc.2.6.81088906.PC            | 81088906                   | 82253083                   |           |                      |                       |
| MNEc.2.6.81089958.PC            | 81089958                   | 82254135                   |           | X                    | X                     |
| MNEc.2.6.81091853.PC            | 81091853                   | 82256030                   |           |                      |                       |
| MNEc.2.6.81092504.PC            | 81092504                   | 82256681                   |           |                      |                       |
| MNEc.2.6.81095746.PC            | 81095746                   | 82269987                   |           |                      | X                     |

| <b>Axiom MCEc2M SNP ID</b>      | <b>EquCab2 BP Location</b> | <b>EquCab3 BP Location</b> | <b>Di</b> | <b>Height Assoc.</b> | <b>Insulin Assoc.</b> |
|---------------------------------|----------------------------|----------------------------|-----------|----------------------|-----------------------|
| MNEc.2.6.81092730.PC            | 81092730                   | 82256907                   |           |                      |                       |
| MNEc.2.6.81096691.PC            | 81096691                   | 82260932                   |           |                      |                       |
| MNEc.2.6.81097039.PC            | 81097039                   | 82261280                   |           | X                    |                       |
| MNEc.2.6.81099063.BIEC2-1024097 | 81099063                   | 82263304                   |           |                      | X                     |
| MNEc.2.6.81100715.PC            | 81100715                   | 82264956                   |           |                      |                       |
| MNEc.2.6.81101410.PC            | 81101410                   | 82265651                   |           | X                    | X                     |
| MNEc.2.6.81105042.PC            | 81105042                   | 82269283                   |           |                      |                       |
| MNEc.2.6.81107367.PC            | 81107367                   | 82271611                   |           |                      |                       |
| MNEc.2.6.81107765.PC            | 81107765                   | 82272009                   |           |                      |                       |
| MNEc.2.6.81108269.PC            | 81108269                   | 82272513                   | X         |                      |                       |
| MNEc.2.6.81110483.PC            | 81110483                   | 82274730                   | X         |                      |                       |
| MNEc.2.6.81111923.PC            | 81111923                   | 82276170                   | X         |                      |                       |
| MNEc.2.6.81113370.PC            | 81113370                   | 82277617                   | X         |                      |                       |
| MNEc.2.6.81114838.PC            | 81114838                   | 82279085                   | X         |                      |                       |
| MNEc.2.6.81116592.PC            | 81116592                   | 82280839                   | X         |                      |                       |
| MNEc.2.6.81116663.PC            | 81116663                   | 82280910                   | X         | X                    |                       |
| MNEc.2.6.81117653.PC            | 81117653                   | 82281900                   | X         |                      |                       |
| MNEc.2.6.81127246.PC            | 81127246                   | 82291777                   | X         |                      |                       |
| MNEc.2.6.81131003.PC            | 81131003                   | 82295534                   | X         | X                    |                       |
| MNEc.2.6.81132667.PC            | 81132667                   | 82297198                   | X         |                      |                       |
| MNEc.2.6.81138611.PC            | 81138611                   | 82303142                   | X         |                      |                       |
| MNEc.2.6.81145454.PC            | 81145454                   | 82309986                   | X         |                      |                       |
| MNEc.2.6.81146607.PC            | 81146607                   | 82311139                   | X         |                      |                       |
| MNEc.2.6.81147917.PC            | 81147917                   | 82312449                   | X         | X                    |                       |
| MNEc.2.6.81148466.PC            | 81148466                   | 82312998                   | X         |                      |                       |
| MNEc.2.6.81148841.PC            | 81148841                   | 82313373                   | X         |                      |                       |
| MNEc.2.6.81149038.PC            | 81149038                   | 82313570                   | X         | X                    |                       |
| MNEc.2.6.81150141.PC            | 81150141                   | 82314673                   | X         |                      |                       |
| MNEc.2.6.81150674.PC            | 81150674                   | 82315206                   | X         |                      |                       |
| MNEc.2.6.81150862.PC            | 81150862                   | 82315394                   | X         |                      |                       |
| MNEc.2.6.81151323.PC            | 81151323                   | 82315855                   | X         | X                    |                       |
| MNEc.2.6.81152002.PC            | 81152002                   | 82316534                   | X         | X                    |                       |
| MNEc.2.6.81152832.PC            | 81152832                   | 82317364                   | X         |                      |                       |
| MNEc.2.6.81154362.PC            | 81154362                   | 82318894                   | X         |                      |                       |
| MNEc.2.6.81155025.PC            | 81155025                   | 82319557                   | X         | X                    |                       |
| MNEc.2.6.81155688.PC            | 81155688                   | 82320220                   | X         |                      |                       |
| MNEc.2.6.81155869.PC            | 81155869                   | 82320401                   | X         | X                    |                       |
| MNEc.2.6.81156390.PC            | 81156390                   | 82320922                   | X         |                      |                       |
| MNEc.2.6.81156975.PC            | 81156975                   | 82321507                   | X         |                      |                       |
| MNEc.2.6.81157724.PC            | 81157724                   | 82322256                   | X         |                      |                       |
| MNEc.2.6.81159639.PC            | 81159639                   | 82324171                   |           |                      |                       |
| MNEc.2.6.81160030.PC            | 81160030                   | 82324562                   |           |                      |                       |
| MNEc.2.6.81161980.PC            | 81161980                   | 82326512                   |           |                      |                       |
| MNEc.2.6.81167162.PC            | 81167162                   | 82331694                   |           | X                    |                       |
| MNEc.2.6.81168395.PC            | 81168395                   | 82332927                   |           |                      |                       |
| MNEc.2.6.81168833.PC            | 81168833                   | 82333365                   | X         | X                    |                       |
| MNEc.2.6.81171121.PC            | 81171121                   | 82335653                   | X         | X                    |                       |
| MNEc.2.6.81175201.PC            | 81175201                   | 82339734                   | X         | X                    |                       |
| MNEc.2.6.81176493.BIEC2-1024128 | 81176493                   | 82341026                   | X         |                      |                       |
| MNEc.2.6.81176653.BIEC2-1024129 | 81176653                   | 82341186                   | X         |                      |                       |
| MNEc.2.6.81176905.PC            | 81176905                   | 82341438                   | X         |                      |                       |

| <b>Axiom MCEc2M SNP ID</b>      | <b>EquCab2 BP Location</b> | <b>EquCab3 BP Location</b> | <b>Di</b> | <b>Height Assoc.</b> | <b>Insulin Assoc.</b> |
|---------------------------------|----------------------------|----------------------------|-----------|----------------------|-----------------------|
| MNEc.2.6.81181575.PC            | 81181575                   | 82346108                   | X         |                      |                       |
| MNEc.2.6.81183704.PC            | 81183704                   | 82348237                   |           | X                    |                       |
| MNEc.2.6.81185362.PC            | 81185362                   | 82349895                   |           | X                    |                       |
| MNEc.2.6.81193866.PC            | 81193866                   | 82358399                   |           |                      |                       |
| MNEc.2.6.81196676.PC            | 81196676                   | 82361209                   |           | X                    |                       |
| MNEc.2.6.81197672.PC            | 81197672                   | 82362205                   |           |                      |                       |
| MNEc.2.6.81198310.PC            | 81198310                   | 82362843                   |           | X                    |                       |
| MNEc.2.6.81198765.PC            | 81198765                   | 82363298                   |           |                      |                       |
| MNEc.2.6.81199128.PC            | 81199128                   | 82363661                   |           |                      |                       |
| MNEc.2.6.81199762.PC            | 81199762                   | 82364295                   |           |                      |                       |
| MNEc.2.6.81200192.PC            | 81200192                   | 82364725                   |           |                      |                       |
| MNEc.2.6.81200578.PC            | 81200578                   | 82365111                   |           | X                    |                       |
| MNEc.2.6.81200658.PC            | 81200658                   | 82365191                   |           |                      |                       |
| MNEc.2.6.81200913.PC            | 81200913                   | 82365446                   |           |                      |                       |
| MNEc.2.6.81201314.PC            | 81201314                   | 82365847                   |           |                      |                       |
| MNEc.2.6.81201348.PC            | 81201348                   | 82365881                   |           | X                    |                       |
| MNEc.2.6.81201373.PC            | 81201373                   | 82365906                   |           |                      |                       |
| MNEc.2.6.81203959.PC            | 81203959                   | 82368492                   |           | X                    |                       |
| MNEc.2.6.81205065.PC            | 81205065                   | 82369598                   |           |                      |                       |
| MNEc.2.6.81205686.PC            | 81205686                   | 82370219                   |           |                      |                       |
| MNEc.2.6.81210715.PC            | 81210715                   | 82375248                   |           |                      |                       |
| MNEc.2.6.81213956.PC            | 81213956                   | 82378489                   |           |                      |                       |
| MNEc.2.6.81215555.PC            | 81215555                   | 82380088                   |           | X                    |                       |
| MNEc.2.6.81216957.BIEC2-1024137 | 81216957                   | 82381490                   |           | X                    |                       |
| MNEc.2.6.81218021.PC            | 81218021                   | 82382554                   |           |                      |                       |
| MNEc.2.6.81218092.PC            | 81218092                   | 82382625                   |           |                      |                       |
| MNEc.2.6.81218897.PC            | 81218897                   | 82383430                   |           |                      |                       |
| MNEc.2.6.81224318.PC            | 81224318                   | 82388851                   |           |                      |                       |
| MNEc.2.6.81227730.PC            | 81227730                   | 82392263                   | X         |                      |                       |
| MNEc.2.6.81231288.PC            | 81231288                   | 82395821                   | X         |                      |                       |
| MNEc.2.6.81231316.PC            | 81231316                   | 82395849                   | X         |                      |                       |
| MNEc.2.6.81235378.PC            | 81235378                   | 82399911                   | X         | X                    |                       |
| MNEc.2.6.81236569.PC            | 81236569                   | 82401102                   | X         | X                    |                       |
| MNEc.2.6.81237287.PC            | 81237287                   | 82401820                   | X         | X                    |                       |
| MNEc.2.6.81242767.PC            | 81242767                   | 82407300                   |           |                      |                       |
| MNEc.2.6.81242979.PC            | 81242979                   | 82407512                   |           |                      |                       |
| MNEc.2.6.81245868.PC            | 81245868                   | 82410401                   |           |                      |                       |
| MNEc.2.6.81246188.PC            | 81246188                   | 82410721                   |           |                      |                       |
| MNEc.2.6.81250359.PC            | 81250359                   | 82414892                   |           | X                    |                       |
| MNEc.2.6.81250799.PC            | 81250799                   | 82415332                   |           | X                    |                       |
| MNEc.2.6.81252426.PC            | 81252426                   | 82416959                   |           |                      |                       |
| MNEc.2.6.81254844.PC            | 81254844                   | 82419377                   |           |                      |                       |
| MNEc.2.6.81257395.PC            | 81257395                   | 82421926                   |           |                      |                       |
| MNEc.2.6.81260218.PC            | 81260218                   | 82424749                   |           |                      |                       |
| MNEc.2.6.81260989.PC            | 81260989                   | 82425520                   |           | X                    |                       |
| MNEc.2.6.81261983.PC            | 81261983                   | 82426514                   |           |                      |                       |
| MNEc.2.6.81263291.PC            | 81263291                   | 82427823                   |           |                      |                       |
| MNEc.2.6.81264617.PC            | 81264617                   | 82429149                   |           |                      |                       |
| MNEc.2.6.81265503.PC            | 81265503                   | 82430033                   |           |                      |                       |
| MNEc.2.6.81265743.PC            | 81265743                   | 82430273                   |           |                      |                       |
| MNEc.2.6.81265835.PC            | 81265835                   | 82430365                   |           | X                    |                       |

| <b>Axiom MCEc2M SNP ID</b> | <b>EquCab2 BP Location</b> | <b>EquCab3 BP Location</b> | <b>Di</b> | <b>Height Assoc.</b> | <b>Insulin Assoc.</b> |
|----------------------------|----------------------------|----------------------------|-----------|----------------------|-----------------------|
| MNEc.2.6.81274342.PC       | 81274342                   | 82438510                   | X         | X                    |                       |
| MNEc.2.6.81275539.PC       | 81275539                   | 82439707                   | X         |                      | X                     |
| MNEc.2.6.81275716.PC       | 81275716                   | 82439884                   | X         |                      |                       |
| MNEc.2.6.81280716.PC       | 81280716                   | 82444884                   | X         |                      |                       |
| MNEc.2.6.81286888.PC       | 81286888                   | 82451056                   | X         | X                    |                       |
| MNEc.2.6.81288528.PC       | 81288528                   | 82452696                   | X         | X                    |                       |
| MNEc.2.6.81291848.PC       | 81291848                   | 82456016                   | X         |                      | X                     |
| MNEc.2.6.81293583.PC       | 81293583                   | 82457751                   | X         | X                    |                       |
| MNEc.2.6.81300883.PC       | 81300883                   | 82465051                   | X         |                      |                       |
| MNEc.2.6.81305201.PC       | 81305201                   | 82469369                   |           |                      |                       |
| MNEc.2.6.81307622.PC       | 81307622                   | 82471790                   | X         |                      |                       |
| MNEc.2.6.81308993.PC       | 81308993                   | 82473161                   | X         |                      |                       |
| MNEc.2.6.81309029.PC       | 81309029                   | 82473197                   | X         | X                    |                       |
| MNEc.2.6.81309194.PC       | 81309194                   | 82473362                   | X         | X                    |                       |
| MNEc.2.6.81309349.PC       | 81309349                   | 82473517                   | X         | X                    | X                     |
| MNEc.2.6.81310074.PC       | 81310074                   | 82474242                   | X         |                      |                       |
| MNEc.2.6.81312462.PC       | 81312462                   | 82476630                   | X         |                      |                       |
| MNEc.2.6.81312691.PC       | 81312691                   | 82476859                   | X         |                      |                       |
| MNEc.2.6.81312805.PC       | 81312805                   | 82476973                   | X         |                      |                       |
| MNEc.2.6.81313479.PC       | 81313479                   | 82477647                   | X         | X                    |                       |
| MNEc.2.6.81320405.PC       | 81320405                   | 82484592                   | X         | X                    |                       |
| MNEc.2.6.81322229.PC       | 81322229                   | 82486416                   | X         | X                    | X                     |
| MNEc.2.6.81329646.PC       | 81329646                   | 82493449                   | X         |                      |                       |
| MNEc.2.6.81333137.PC       | 81333137                   | 82496940                   |           | X                    |                       |
| MNEc.2.6.81333372.PC       | 81333372                   | 82497175                   |           |                      | X                     |
| MNEc.2.6.81340647.PC       | 81340647                   | 82504450                   | X         | X                    |                       |
| MNEc.2.6.81340998.PC       | 81340998                   | 80204801                   | X         |                      | X                     |
| MNEc.2.6.81342894.PC       | 81342894                   | 82506697                   | X         |                      |                       |
| MNEc.2.6.81344532.PC       | 81344532                   | 82508335                   | X         |                      | X                     |
| MNEc.2.6.81348453.PC       | 81348453                   | 82512256                   | X         |                      | X                     |
| MNEc.2.6.81347830.PC       | 81347830                   | 82511633                   | X         |                      |                       |
| MNEc.2.6.81347974.PC       | 81347974                   | 82511777                   | X         |                      |                       |
| MNEc.2.6.81352276.PC       | 81352276                   | 82516073                   | X         |                      |                       |
| MNEc.2.6.81354701.PC       | 81354701                   | 82518498                   |           |                      |                       |
| MNEc.2.6.81356993.PC       | 81356993                   | 82520790                   |           | X                    |                       |
| MNEc.2.6.81358887.PC       | 81358887                   | 82522684                   |           |                      |                       |
| MNEc.2.6.81361483.PC       | 81361483                   | 82525280                   | X         | X                    |                       |
| MNEc.2.6.81361520.PC       | 81361520                   | 82525317                   | X         |                      |                       |
| MNEc.2.6.81365395.PC       | 81365395                   | 82529192                   | X         | X                    |                       |
| MNEc.2.6.81367697.PC       | 81367697                   | 82531494                   | X         |                      |                       |
| MNEc.2.6.81368345.PC       | 81368345                   | 82532142                   | X         | X                    |                       |
| MNEc.2.6.81381221.PC       | 81381221                   | 82545021                   | X         | X                    |                       |
| MNEc.2.6.81382533.PC       | 81382533                   | 82546333                   | X         |                      | X                     |
| MNEc.2.6.81392217.PC       | 81392217                   | 82555953                   | X         |                      |                       |
| MNEc.2.6.81392910.PC       | 81392910                   | 82556646                   |           | X                    |                       |
| MNEc.2.6.81396654.PC       | 81396654                   | 82560390                   |           |                      |                       |
| MNEc.2.6.81398600.PC       | 81398600                   | 82562336                   |           |                      |                       |
| MNEc.2.6.81400279.PC       | 81400279                   | 82564015                   |           | X                    | X                     |
| MNEc.2.6.81405725.PC       | 81405725                   | 82569461                   | X         | X                    | X                     |
| MNEc.2.6.81407183.PC       | 81407183                   | 82570919                   | X         | X                    |                       |
| MNEc.2.6.81408708.PC       | 81408708                   | 82572444                   | X         |                      |                       |



| <b>Axiom MCEc2M SNP ID</b>       | <b>EquCab2 BP Location</b> | <b>EquCab3 BP Location</b> | <b>Di</b> | <b>Height Assoc.</b> | <b>Insulin Assoc.</b> |
|----------------------------------|----------------------------|----------------------------|-----------|----------------------|-----------------------|
| MNEc.2.6.81409678.PC             | 81409678                   | 82573414                   | X         |                      |                       |
| MNEc.2.6.81411449.PC             | 81411449                   | 82575185                   | X         | X                    |                       |
| MNEc.2.6.81413254.PC             | 81413254                   | 82576990                   | X         | X                    | X                     |
| MNEc.2.6.81414435.PC             | 81414435                   | 82578171                   | X         |                      |                       |
| MNEc.2.6.81415276.PC             | 81415276                   | 82579013                   | X         |                      |                       |
| MNEc.2.6.81417632.BIEC2-1024187  | 81417632                   | 82581369                   | X         |                      |                       |
| MNEc.2.6.81421330.PC             | 81421330                   | 82585066                   | X         | X                    | X                     |
| MNEc.2.6.81431568.PC             | 81431568                   | 82595304                   | X         |                      | X                     |
| MNEc.2.6.81432131.PC             | 81432131                   | 82595867                   | X         |                      | X                     |
| MNEc.2.6.81434058.PC             | 81434058                   | 82597794                   | X         | X                    |                       |
| MNEc.2.6.81440665.PC             | 81440665                   | 82604401                   | X         | X                    |                       |
| MNEc.2.6.81441526.PC             | 81441526                   | 82605262                   | X         |                      |                       |
| MNEc.2.6.81443295.PC             | 81443295                   | 82607030                   | X         |                      | X                     |
| MNEc.2.6.81446353.PC             | 81446353                   | 82610088                   | X         |                      | X                     |
| MNEc.2.6.81451782.BIEC2-1024200  | 81451782                   | 82615517                   | X         | X                    | X                     |
| MNEc.2.6.81458759.PC             | 81458759                   | 82622494                   | X         | X                    | X                     |
| MNEc.2.6.81463114.PC             | 81463114                   | 82626849                   | X         | X                    | X                     |
| MNEc.2.6.81468176.PC             | 81468176                   | 82631911                   | X         |                      |                       |
| MNEc.2.6.81469661.PC             | 81469661                   | 82633396                   | X         |                      |                       |
| MNEc.2.6.81468256.PC             | 81468256                   | 82631991                   | X         |                      | X                     |
| MNEc.2.6.81471494.PC             | 81471494                   | 82635229                   | X         |                      |                       |
| MNEc.2.6.81473575.PC             | 81473575                   | 82637310                   | X         |                      | X                     |
| MNEc.2.6.81474930.PC             | 81474930                   | 82638665                   | X         | X                    |                       |
| MNEc.2.6.81475049.PC             | 81475049                   | 82638784                   | X         | X                    |                       |
| MNEc.2.6.81476437.PC             | 81476437                   | 82640172                   | X         | X                    | X                     |
| MNEc.2.6.81481065.PC             | 81481065                   | 82644800                   |           |                      | X                     |
| MNEc.2.6.81482862.PC             | 81482862                   | 82646597                   |           |                      |                       |
| MNEc.2.6.81488131.PC             | 81488131                   | 82651920                   |           | X                    |                       |
| MNEc.2.6.81490123.PC             | 81490123                   | 82653915                   | X         | X                    | X                     |
| MNEc.2.6.81492423.PC             | 81492423                   | 82656215                   | X         | X                    | X                     |
| MNEc.2.6.81494335.PC             | 81494335                   | 82658127                   | X         | X                    |                       |
| MNEc.2.6.81497380.PC             | 81497380                   | 82661169                   | X         | X                    | X                     |
| MNEc.2.6.81498052.PC             | 81498052                   | 82661841                   | X         | X                    |                       |
| MNEc.2.6.81503348.PC             | 81503348                   | 82667137                   | X         |                      |                       |
| MNEc.2.6.81503730.PC             | 81503730                   | 82667518                   | X         |                      | X                     |
| MNEc.2.6.81505709.PC             | 81505709                   | 82669497                   | X         | X                    | X                     |
| MNEc.2.6.81506349.PC             | 81506349                   | 82670137                   | X         |                      |                       |
| MNEc.2.6.81507212.PC             | 81507212                   | 82671000                   | X         | X                    | X                     |
| MNEc.2.6.81507310.PC             | 81507310                   | 82671098                   | X         | X                    | X                     |
| MNEc.2.6.81508624.PC             | 81508624                   | 82672412                   | X         |                      |                       |
| MNEc.2.6.81509429.TBIEC2-1024215 | 81509429                   | 82673217                   | X         |                      |                       |
| MNEc.2.6.81510788.PC             | 81510788                   | 82674576                   | X         |                      |                       |
| MNEc.2.6.81514907.PC             | 81514907                   | 82678695                   | X         | X                    | X                     |
| MNEc.2.6.81516706.BIEC2-1024218  | 81516706                   | 82680494                   | X         | X                    |                       |
| MNEc.2.6.81521876.PC             | 81521876                   | 82685665                   | X         | X                    |                       |
| MNEc.2.6.81523773.PC             | 81523773                   | 82687562                   | X         | X                    | X                     |
| MNEc.2.6.81523837.PC             | 81523837                   | 82687626                   | X         |                      | X                     |
| MNEc.2.6.81526828.PC             | 81526828                   | 82690617                   | X         | X                    | X                     |
| MNEc.2.6.81527285.PC             | 81527285                   | 82691074                   | X         |                      |                       |
| MNEc.2.6.81528014.PC             | 81528014                   | 82691803                   | X         | X                    |                       |
| MNEc.2.6.81532654.PC             | 81532654                   | 82696455                   | X         |                      | X                     |

| <b>Axiom MCEc2M SNP ID</b>      | <b>EquCab2 BP Location</b> | <b>EquCab3 BP Location</b> | <b>Di</b> | <b>Height Assoc.</b> | <b>Insulin Assoc.</b> |
|---------------------------------|----------------------------|----------------------------|-----------|----------------------|-----------------------|
| MNEc.2.6.81533130.PC            | 81533130                   | 82696931                   | X         | X                    |                       |
| MNEc.2.6.81533415.PC            | 81533415                   | 82697216                   | X         | X                    | X                     |
| MNEc.2.6.81533975.PC            | 81533975                   | 82697776                   | X         | X                    | X                     |
| MNEc.2.6.81535308.PC            | 81535308                   | 82699109                   | X         |                      |                       |
| MNEc.2.6.81536480.PC            | 81536480                   | 82700281                   | X         | X                    |                       |
| MNEc.2.6.81536796.PC            | 81536796                   | 82700597                   | X         |                      |                       |
| MNEc.2.6.81541746.PC            | 81541746                   | 82705547                   |           | X                    |                       |
| MNEc.2.6.81551984.PC            | 81551984                   | 82715786                   | X         | X                    |                       |
| MNEc.2.6.81553061.PC            | 81553061                   | 82716863                   | X         |                      | X                     |
| MNEc.2.6.81554945.PC            | 81554945                   | 82718747                   | X         |                      |                       |
| MNEc.2.6.81557294.BIEC2-1024233 | 81557294                   | 82721096                   | X         | X                    | X                     |
| MNEc.2.6.81558781.PC            | 81558781                   | 82722583                   | X         |                      |                       |
| MNEc.2.6.81560279.PC            | 81560279                   | 82724081                   | X         |                      |                       |
| MNEc.2.6.81566120.PC            | 81566120                   | 82729921                   | X         | X                    |                       |
| MNEc.2.6.81568749.PC            | 81568749                   | 82732548                   | X         | X                    | X                     |
| MNEc.2.6.81575176.PC            | 81575176                   | 82738976                   | X         |                      |                       |
| MNEc.2.6.81575713.PC            | 81575713                   | 82739513                   | X         | X                    |                       |
| MNEc.2.6.81576419.PC            | 81576419                   | 82740219                   | X         |                      |                       |
| MNEc.2.6.81576767.PC            | 81576767                   | 82740567                   | X         |                      |                       |
| MNEc.2.6.81577868.PC            | 81577868                   | 82741668                   | X         |                      |                       |
| MNEc.2.6.81583349.PC            | 81583349                   | 82747149                   |           |                      |                       |
| MNEc.2.6.81583507.PC            | 81583507                   | 82747307                   |           |                      |                       |
| MNEc.2.6.81585047.PC            | 81585047                   | 82748847                   |           |                      |                       |
| MNEc.2.6.81589592.PC            | 81589592                   | 82753392                   | X         |                      |                       |
| MNEc.2.6.81590012.PC            | 81590012                   | 82753812                   | X         |                      |                       |
| MNEc.2.6.81591558.PC            | 81591558                   | 82755358                   | X         | X                    |                       |
| MNEc.2.6.81591919.PC            | 81591919                   | 82755719                   | X         |                      |                       |
| MNEc.2.6.81600981.PC            | 81600981                   | 82764783                   | X         |                      |                       |
| MNEc.2.6.81602184.PC            | 81602184                   | 82765986                   | X         |                      |                       |
| MNEc.2.6.81602630.BIEC2-1024255 | 81602630                   | 82766432                   | X         |                      |                       |
| MNEc.2.6.81602938.PC            | 81602938                   | 82766740                   | X         | X                    |                       |
| MNEc.2.6.81603378.PC            | 81603378                   | 82767180                   | X         |                      |                       |
| MNEc.2.6.81605181.PC            | 81605181                   | 82768983                   | X         | X                    |                       |
| MNEc.2.6.81605475.PC            | 81605475                   | 82769277                   | X         |                      |                       |
| MNEc.2.6.81612750.PC            | 81612750                   | 82776553                   | X         |                      |                       |
| MNEc.2.6.81614184.PC            | 81614184                   | 82777987                   | X         |                      |                       |
| MNEc.2.6.81614934.PC            | 81614934                   | 82778737                   | X         |                      |                       |
| MNEc.2.6.81615849.PC            | 81615849                   | 82779652                   | X         | X                    |                       |
| MNEc.2.6.81624548.PC            | 81624548                   | 82788363                   | X         |                      |                       |
| MNEc.2.6.81625635.PC            | 81625635                   | 82789450                   | X         |                      |                       |
| MNEc.2.6.81626239.PC            | 81626239                   | 82790054                   | X         | X                    |                       |
| MNEc.2.6.81634717.PC            | 81634717                   | 82798532                   | X         | X                    |                       |
| MNEc.2.6.81635994.PC            | 81635994                   | 82799809                   | X         |                      |                       |
| MNEc.2.6.81637171.PC            | 81637171                   | 82800986                   | X         |                      |                       |
| MNEc.2.6.81643314.BIEC2-971389  | 81643314                   | 82807129                   | X         |                      | X                     |
| MNEc.2.6.81647854.PC            | 81647854                   | 82811669                   | X         |                      |                       |
| MNEc.2.6.81649941.PC            | 81649941                   | 82813756                   | X         |                      |                       |
| MNEc.2.6.81653476.PC            | 81653476                   | 82817291                   |           |                      | X                     |
| MNEc.2.6.81663656.PC            | 81663656                   | 82827472                   |           |                      |                       |
| MNEc.2.6.81664538.PC            | 81664538                   | 82828354                   |           |                      |                       |
| MNEc.2.6.81666343.PC            | 81666343                   | 82830159                   |           | X                    |                       |

| <b>Axiom MCEc2M SNP ID</b> | <b>EquCab2 BP Location</b> | <b>EquCab3 BP Location</b> | <b>Di</b> | <b>Height Assoc.</b> | <b>Insulin Assoc.</b> |
|----------------------------|----------------------------|----------------------------|-----------|----------------------|-----------------------|
| MNEc.2.6.81666520.PC       | 81666520                   | 82830336                   |           |                      |                       |
| MNEc.2.6.81669670.PC       | 81669670                   | 82833486                   |           | X                    |                       |
| MNEc.2.6.81671214.PC       | 81671214                   | 82835030                   | X         |                      |                       |
| MNEc.2.6.81694523.PC       | 81694523                   | 82858459                   | X         |                      |                       |
| MNEc.2.6.81695495.PC       | 81695495                   | 82859431                   | X         | X                    |                       |
| MNEc.2.6.81695968.PC       | 81695968                   | 82859904                   | X         |                      |                       |
| MNEc.2.6.81696642.PC       | 81696642                   | 82860578                   | X         |                      |                       |
| MNEc.2.6.81700931.PC       | 81700931                   | 82864787                   |           |                      |                       |
| MNEc.2.6.81703726.PC       | 81703726                   | 82867582                   |           |                      |                       |
| MNEc.2.6.81705123.PC       | 81705123                   | 82868979                   |           |                      |                       |
| MNEc.2.6.81707385.PC       | 81707385                   | 82871241                   | X         | X                    |                       |
| MNEc.2.6.81710589.PC       | 81710589                   | 82874445                   | X         |                      |                       |
| MNEc.2.6.81711770.PC       | 81711770                   | 82875626                   | X         |                      |                       |
| MNEc.2.6.81715109.PC       | 81715109                   | 82878965                   | X         |                      |                       |
| MNEc.2.6.81720090.PC       | 81720090                   | 82883946                   | X         |                      |                       |
| MNEc.2.6.81722649.PC       | 81722649                   | 82886505                   | X         | X                    |                       |
| MNEc.2.6.81722944.PC       | 81722944                   | 82886800                   | X         |                      |                       |
| MNEc.2.6.81725228.PC       | 81725228                   | 82889084                   | X         |                      |                       |
| MNEc.2.6.81727663.PC       | 81727663                   | 82891519                   | X         |                      |                       |
| MNEc.2.6.81728172.PC       | 81728172                   | 82892028                   | X         |                      |                       |
| MNEc.2.6.81735717.PC       | 81735717                   | 82899573                   | X         |                      |                       |
| MNEc.2.6.81740361.PC       | 81740361                   | 82904217                   | X         |                      |                       |
| MNEc.2.6.81742978.PC       | 81742978                   | 82906837                   | X         |                      |                       |
| MNEc.2.6.81749291.PC       | 81749291                   | 82913150                   | X         |                      |                       |
| MNEc.2.6.81752110.PC       | 81752110                   | 82915969                   | X         | X                    |                       |
| MNEc.2.6.81753106.PC       | 81753106                   | 82916923                   | X         |                      |                       |
| MNEc.2.6.81753656.PC       | 81753656                   | 82917473                   | X         |                      |                       |
| MNEc.2.6.81755922.PC       | 81755922                   | 82919739                   | X         | X                    |                       |
| MNEc.2.6.81759471.PC       | 81759471                   | 82923288                   | X         |                      |                       |
| MNEc.2.6.81764808.PC       | 81764808                   | 82928625                   | X         |                      |                       |
| MNEc.2.6.81764849.PC       | 81764849                   | 82928666                   | X         | X                    |                       |
| MNEc.2.6.81766028.PC       | 81766028                   | 82929796                   | X         |                      |                       |
| MNEc.2.6.81774220.PC       | 81774220                   | 82937922                   | X         |                      |                       |
| MNEc.2.6.81774286.PC       | 81774286                   | 82937988                   | X         |                      |                       |
| MNEc.2.6.81777995.PC       | 81777995                   | 82941697                   | X         |                      |                       |
| MNEc.2.6.81780992.PC       | 81780992                   | 82944695                   | X         | X                    |                       |
| MNEc.2.6.81782298.PC       | 81782298                   | 82946001                   | X         |                      |                       |
| MNEc.2.6.81784570.PC       | 81784570                   | 82948273                   | X         |                      |                       |
| MNEc.2.6.81785714.PC       | 81785714                   | 82949417                   | X         |                      |                       |
| MNEc.2.6.81788701.PC       | 81788701                   | 82952403                   | X         |                      |                       |
| MNEc.2.6.81789212.PC       | 81789212                   | 82952914                   | X         |                      |                       |
| MNEc.2.6.81791707.PC       | 81791707                   | 82955409                   |           |                      |                       |
| MNEc.2.6.81793853.PC       | 81793853                   | 82957368                   |           |                      |                       |
| MNEc.2.6.81795218.PC       | 81795218                   | 82958733                   |           |                      |                       |
| MNEc.2.6.81795964.PC       | 81795964                   | 82959479                   |           |                      |                       |
| MNEc.2.6.81796099.PC       | 81796099                   | 82959614                   |           |                      |                       |
| MNEc.2.6.81799715.PC       | 81799715                   | 82963230                   |           |                      |                       |
| MNEc.2.6.81801026.PC       | 81801026                   | 82964541                   |           |                      |                       |
| MNEc.2.6.81802027.PC       | 81802027                   | 82965542                   |           |                      |                       |
| MNEc.2.6.81802264.PC       | 81802264                   | 82965779                   |           |                      |                       |
| MNEc.2.6.81804903.PC       | 81804903                   | 82968419                   |           |                      |                       |

| Axiom MCEc2M SNP ID  | EquCab2 BP Location | EquCab3 BP Location | Di | Height Assoc. | Insulin Assoc. |
|----------------------|---------------------|---------------------|----|---------------|----------------|
| MNEc.2.6.81806445.PC | 81806445            | 82969961            |    |               |                |
| MNEc.2.6.81808008.PC | 81808008            | 82971523            |    | X             |                |
| MNEc.2.6.81809066.PC | 81809066            | 82972582            |    |               |                |

**Supplemental Table 6: EquCab2 and EquCab3 base pair (bp) position for SNPs on the Axiom MCEc2M within the region of interest on equine chromosome 6 (ECA6) bp positions 80,499,826-81,809,066.** SNPs (presented by their Axiom MCEc2M SNP ID) within the entire region of interest were remapped to EquCab3 (manuscript in preparation: Beeson S., Schaefer R., Mason V., McCue M.. "Robust remapping of equine SNP array coordinates to EquCab3."). EquCab3 coordinates were not provided for three SNPs as they did not have probes that mapped uniquely to EquCab3. SNPs which exceeded the threshold for genome wide significance on association analysis (Assoc) for height and baseline insulin are indicated by an X. Significant di windows are based on the average base pair position within a 10Kb window of SNPs. SNPs marked with an X represent 5Kb upstream and 5Kb downstream of the base pair location.

| Breed               | INS                                              | INS-OST                          | GLU                                              | GLU-OST                                        | NEFA                            | TG                                            | LEPTIN                                        | ADIPON                                         | ACTH                                             |
|---------------------|--------------------------------------------------|----------------------------------|--------------------------------------------------|------------------------------------------------|---------------------------------|-----------------------------------------------|-----------------------------------------------|------------------------------------------------|--------------------------------------------------|
| All Horses<br>n=830 | <b>-.15</b><br>(-.21, -.079)<br><b>p&lt;.001</b> | -.053<br>(-.13, .019)<br>p=.15   | <b>-.14</b><br>(-.21, -.076)<br><b>p&lt;.001</b> | <b>-.10</b><br>(-.18, -.031)<br><b>p=.0051</b> | -.063<br>(-.13, .005)<br>p=.069 | <b>.12</b><br>(.055, .19)<br><b>p&lt;.001</b> | <b>.12</b><br>(.048, .18)<br><b>p&lt;.001</b> | <b>-.22</b><br>(-.21,0.15)<br><b>p&lt;.001</b> | <b>-.13</b><br>(-.19, -.060)<br><b>p&lt;.001</b> |
| Ponies<br>n=301     | <b>-.33</b><br>(-.42, -.29)<br><b>p&lt;.001</b>  | -.15<br>(-.26, -.038)<br>p=.0092 | -.14<br>(-.25, -.027)<br>p=.015                  | -.019<br>(-.13, .097)<br>p=.75                 | -.12<br>(-.23, 0)<br>p=.043     | -.14<br>(-.087, -.03)<br>p=.013               | -.091<br>(-.20, -.023)<br>p=.12               | -.069<br>(-.045, -.18)<br>p=.24                | -.13<br>(-.24, -.019)<br>p=.022                  |

**Supplemental Table 7: Correlations between height and biochemical traits with the addition of seven ponies.** Pearson's correlation coefficients were repeated with the inclusion of seven ponies representing three Shetland ponies, two Hackney ponies, and three British Riding ponies. Presented in the table are: Pearson's correlation coefficients, 95% confidence intervals and p-values for height, eight EMS biochemical traits, and ACTH for the entire cohort as well as just the ponies. All traits were corrected for age and sex prior to analysis. Significant p-values (<.0056) are in bolded text. Abbreviations: INS = insulin, INS-OST = insulin post oral sugar test, GLU = glucose, GLU-OST = glucose post oral sugar test, NEFA = non-esterified fatty acids, TG = triglycerides, ADIPON = adiponectin.
