# Supplementary figures and images for: Evaluation of an HMGA2 variant for pleiotropic effects on height and metabolic traits in ponies
Source: PubMed Central journal article supplement — J Vet Intern Med. 2019 Jan 21;33(2):942–52. doi: 10.1111/jvim.15403 (PMC6430908; doi:10.1111/jvim.15403), 2019-01-21

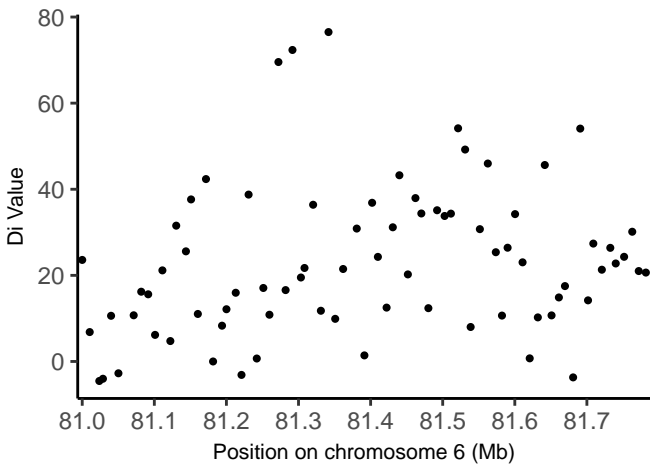

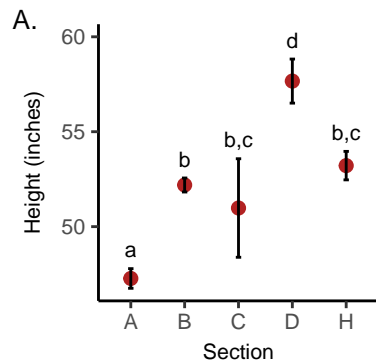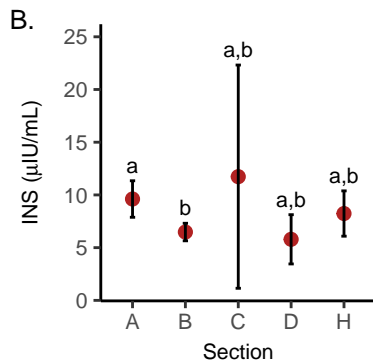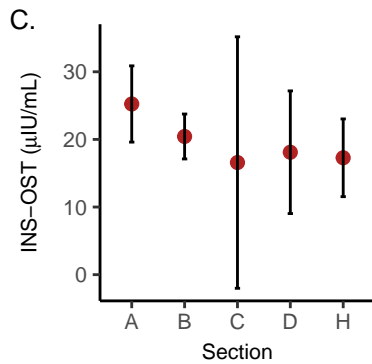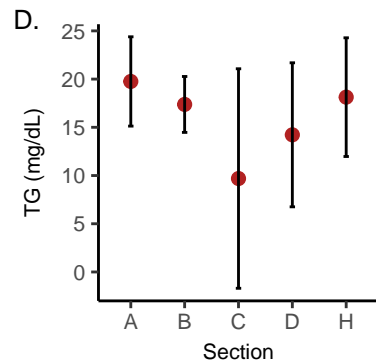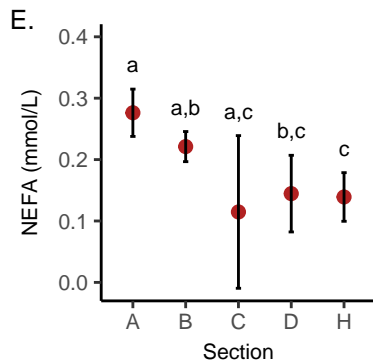

Supplement: JVIM-33-942-s002.pdf [file JVIM-33-942-s002.pdf]
